# Supplementary material for: Network meta-analysis of the efficacy of four traditional Chinese physical exercise therapies on the prevention of falls in the elderly
Source: PubMed Central journal article supplement (PMC9846771; doi:10.3389/fpubh.2022.1096599), 2023-01-04
Supplement: Table_1.pdf [file Table_1.pdf]

## Appendix

Table A1. Basic Characteristics of the Included Literature.

| Sequ<br>ence<br>Num<br>ber | Litera<br>ture<br>Autho<br>r | Publi<br>shed<br>Year | Sex                         | Age               |                          | Sa<br>mpl<br>e | Tes<br>t<br>Gro<br>up | Con<br>trol<br>Gro<br>up | Sport Event        |                                  | Hz<br>/(time·<br>week-1) | Per<br>iod | Prima<br>ry<br>outco<br>me                              |
|----------------------------|------------------------------|-----------------------|-----------------------------|-------------------|--------------------------|----------------|-----------------------|--------------------------|--------------------|----------------------------------|--------------------------|------------|---------------------------------------------------------|
|                            |                              |                       |                             | Test<br>Grou<br>p | Contr<br>ol<br>Grou<br>p |                |                       |                          | Test<br>Gro<br>up  | Control<br>Group                 |                          |            |                                                         |
| 1                          | Shi<br>Xiaoy<br>an           | 2017                  | Mal<br>e、<br>Fe<br>mal<br>e | 64.7±<br>6.3      | 65.5±<br>6.5             | 104            | 52                    | 52                       | Ba<br>Dua<br>n Jin | Walkin<br>g<br>Exercis<br>e      | 2                        | 12         | (TUG<br>T)、<br>(ECL<br>SB)、<br>(BB<br>S)、<br>(MFE<br>S) |
| 2                          | Kuan<br>g<br>Xiaow<br>en     | 2019                  | -                           | 68.68±<br>3.22    | 63-79                    | 82             | 41                    | 41                       | Ba<br>Dua<br>n Jin | Conve<br>ntional<br>Medici<br>ne | -                        | -          | (BB<br>S)                                               |
| 3                          | Wu<br>Xia                    | 2017                  | Mal<br>e、<br>Fe<br>mal<br>e | 70.55±<br>4.26    | 70.55±<br>4.26           | 120            | 60                    | 60                       | Ba<br>Dua<br>n Jin | Routin<br>e Life                 | 14                       | 4          | (TUG<br>T)、<br>(BB<br>S)、<br>(MFE<br>S)                 |
| 4                          | Liu<br>Xiaoy<br>un           | 2016                  | Mal<br>e、<br>Fe<br>mal<br>e | 67.1±<br>6.2      | 67.1±<br>6.2             | 47             | 27                    | 20                       | Ba<br>Dua<br>n Jin | Routin<br>e Life                 | 2                        | 12         | (TUG<br>T)、<br>(ECL<br>SB)、<br>(BB<br>S)、<br>(MFE<br>S) |
| 5                          | Zhou<br>Supo                 | 2020                  | Mal<br>e、<br>Fe<br>mal<br>e | 72.67±<br>9.56    | 73.25±<br>8.54           | 40             | 20                    | 20                       | Ba<br>Dua<br>n Jin | Health<br>Educati<br>on          | 5                        | 8          | (TUG<br>T)、<br>(BB<br>S)                                |
| 6                          | Du<br>Weny<br>uan            | 2018                  | Mal<br>e、<br>Fe<br>mal      | 65.36±<br>4.62    | 67.21±<br>5.61           | 160            | 97                    | 63                       | Ba<br>Dua<br>n Jin | Health<br>Educati<br>on          | 5                        | 24         | (ECL<br>SB)、                                            |

|    |               |      |        |            |            |     |    |    |                    |                                |   |    |                                           |
|----|---------------|------|--------|------------|------------|-----|----|----|--------------------|--------------------------------|---|----|-------------------------------------------|
| 7  | Sun Jiao      | 2022 | Female | 68.3±5.9   | 70.1±5.7   | 138 | 72 | 66 | Ba<br>Dua<br>n Jin | Routin<br>e Life               | 2 | 12 | (ECL<br>SB)、                              |
| 8  | Xu Mengyao    | 2022 | Female | 67.47±8.25 | 67.33±5.96 | 32  | 17 | 15 | Ba<br>Dua<br>n Jin | Routin<br>e Life               | 3 | 12 | (TUG<br>T)、<br>(ECL<br>SB)、               |
| 9  | Gao Zhipeng   | 2020 | Female | 79.79±4.18 | 78.88±4.66 | 68  | 34 | 34 | Ba<br>Dua<br>n Jin | Health<br>Educati<br>on        | 5 | 12 | (TUG<br>T)、                               |
| 10 | Hou Xiaolin   | 2018 | Female | 82.86±4.37 | 83.94±3.38 | 71  | 36 | 35 | Ba<br>Dua<br>n Jin | Resista<br>nce<br>Trainin<br>g | 5 | 12 | (TUG<br>T)、                               |
| 11 | Er Yuling     | 2017 | Female | 67.23±4.54 | 67.22±4.72 | 144 | 71 | 73 | Ba<br>Dua<br>n Jin | Health<br>Educati<br>on        | 5 | 12 | (ECL<br>SB)、<br>(BB<br>S) 、               |
| 12 | Liu Shuangtao | 2015 | —      | 82.14±1.68 | 84.15±2.95 | 15  | 7  | 8  | Ba<br>Dua<br>n Jin | Routin<br>e Life               | 4 | 12 | (TUG<br>T)、                               |
| 13 | Zhang Lifen   | 2012 | Female | 64.60±2.30 | 65.10±1.90 | 60  | 30 | 30 | Ba<br>Dua<br>n Jin | Routin<br>e Life               | 4 | 24 | (BB<br>S) 、                               |
| 14 | Zhao Lei      | 2021 | Female | 65.82±3.88 | 64.35±3.62 | 34  | 17 | 17 | Ba<br>Dua<br>n Jin | Routin<br>e Life               | 3 | 12 | (TUG<br>T)、<br>(ECL<br>SB)、<br>(MFE<br>S) |
| 15 | Zhou Jing     | 2020 | Female | 59.70±6.23 | 61.13±6.04 | 61  | 30 | 31 | Ba<br>Dua<br>n Jin | Routin<br>e Life               | 5 | 13 | (TUG<br>T)、<br>(ECL<br>SB)、               |

|    |                |      |                |                 |                 |     |     |     |                           |                              |   |    |                             |
|----|----------------|------|----------------|-----------------|-----------------|-----|-----|-----|---------------------------|------------------------------|---|----|-----------------------------|
| 16 | Hou<br>Yanshao | 2014 | Male<br>Female | 60-69           | 60-69           | 40  | 20  | 20  | Ba<br>Duan<br>Jin         | Routine<br>Life              | 5 | 12 | (TUG<br>T)、<br>(ECL<br>SB)、 |
| 17 | IngeH<br>.     | 2009 | Male<br>Female | 77.5±<br>4.7    | 76.8±<br>4.6    | 269 | 138 | 131 | Tai<br>Chi                | Routine<br>Life              | 2 | 13 | (BB<br>S)、                  |
| 18 | Padma          | 2014 | Male<br>Female | 81.1±<br>8.0    | 85.4±<br>9.1    | 22  | 11  | 11  | Tai<br>Chi                | Routine<br>Life              | 2 | 14 | (BB<br>S)、                  |
| 19 | Miche<br>l     | 2013 | Male<br>Female | 79.1±<br>6.4    | 80.7±<br>6.0    | 80  | 42  | 38  | Tai<br>Chi                | Conve<br>ntional<br>Medicine |   | 48 | (BB<br>S)、                  |
| 20 | Jian-G<br>uo   | 2006 | Male<br>Female | 70.2±<br>3.6    | 70.6±<br>4.9    | 47  | 24  | 23  | Tai<br>Chi                | Routine<br>Life              | 7 | 8  | (ECL<br>SB)、                |
| 21 | Fuzho<br>ng    | 2005 | Male<br>Female | 76.94±<br>4.69  | 77.99±<br>5.14  | 256 | 125 | 131 | Tai<br>Chi                | Routine<br>Life              | 3 | 24 | (ECL<br>SB)、<br>(BB<br>S)、  |
| 22 | Debor<br>ah    | 2019 | Male<br>Female | 80.4±<br>6.8    | 71.2±<br>6.1    | 29  | 16  | 13  | Tai<br>Chi                | Routine<br>Life              | 4 | 16 | (TUG<br>T)、                 |
| 23 | 류명<br>인        | 2008 | Male<br>Female | 77.70±<br>5.41  | 77.50±<br>6.58  | 47  | 23  | 24  | Tai<br>Ji<br>Exer<br>cise | Routine<br>Life              | 2 | 12 | (MFE<br>S)                  |
| 24 | Hame<br>d      | 2018 | Male<br>Female | 67.20±<br>5.416 | 68.07±<br>5.232 | 53  | 27  | 26  | Tai<br>Chi                | Routine<br>Life              | 3 | 10 | (MFE<br>S)                  |

|    |              |      |             |            |            |     |     |     |         |                       |   |    |                 |
|----|--------------|------|-------------|------------|------------|-----|-----|-----|---------|-----------------------|---|----|-----------------|
| 25 | Jung         | 2005 | Male、Female | 76.96±7.7  | 78.73±6.9  | 59  | 29  | 30  | Tai Chi | Routine Life          | 3 | 12 | (ECLSB)、        |
| 26 | JOSEPH       | 2006 | Female      | 71.5±4.6   | 71.3±4.4   | 19  | 11  | 8   | Tai Chi | Jogging               | 3 | 12 | (ECLSB)、        |
| 27 | Denise       | 2012 | Male、Female | 74.4±6.2   | 73.7±6.2   | 451 | 220 | 231 | Tai Chi | Low-level Exercise    | 2 | 24 | (TUGT)、(ECLSB)、 |
| 28 | Hu Xiu       | 2021 | Male、Female | 66.4 ±1.7  | 66.7 ±1.8  | 31  | 15  | 16  | Tai Chi | Health Education      | 4 | 16 | (TUGT)、(BBS)、   |
| 29 | Hong Du      | 2018 | Female      | 71.26±7.95 | 69.97±8.03 | 72  | 37  | 35  | Tai Chi | Health Education      | 3 | 24 | (ECLSB)、        |
| 30 | Yang Shoulan | 2021 | Male、Female | 65.08±4.05 | 65.08±4.05 | 40  | 20  | 20  | Tai Chi | Routine Life          | - | -  | (TUGT)、(ECLSB)、 |
| 31 | Qiu Yuyu     | 2008 | Female      | Above 65   | Above 65   | 53  | 27  | 26  | Tai Chi | Routine Life          | 7 | 10 | (ECLSB)、        |
| 32 | Tousignant M | 2013 | Male、Female | 79.1±6.4   | 80.7±6.0   | 152 | 76  | 76  | Tai Chi | Conventional Medicine | 2 | 15 | (BBS)、          |
| 33 | Li F         | 2005 | Male、Female | 76.94±4.69 | 77.99±5.14 | 256 | 125 | 131 | Tai Chi | Routine Life          | 3 | 26 | (TUGT)、(ECLSB)、 |



|    |              |      |        |            |            |    |    |    |             |                       |   |    |                 |
|----|--------------|------|--------|------------|------------|----|----|----|-------------|-----------------------|---|----|-----------------|
| 42 | Luo Kailiang | 2022 | Male   | 68.08±5.90 | 66.25±6.24 | 48 | 24 | 24 | Yi Jin Jing | Conventional Medicine | 5 | 4  | (BBS)、          |
| 43 | Zhang Boxin  | 2009 | Male   | 63±5       | 63±5       | 56 | 26 | 30 | Yi Jin Jing | Routine Life          | 3 | 12 | (ECLSB)、        |
| 44 | Hu Li        | 2017 | Female | 65.24±2.94 | 65.52±3.09 | 50 | 25 | 25 | Yi Jin Jing | Routine Life          | 3 | 16 | (TUGT)、(ECLSB)、 |
| 45 | Fang Lei     | 2020 | Male   | 60-95      | 60-95      | 36 | 18 | 18 | Yi Jin Jing | Routine Life          | 3 | 24 | (TUGT)、(MFE S)  |

---
